# Supplementary material for: Barefoot vs Shod Running: An Analysis of Lower Limb Joint Forces
Source: Preprints.org preprint supplement (doi:10.20944/preprints202211.0514.v1), 2022-11-28
Supplement: Supplementary file 3 [file supplementary]

## Sheet: Sheet1
		Ankle	Hip	Knee				Ankle	Hip	Knee				Ankle	Hip	Knee
1	Barefoot	22.5954	20.975	22.5538		1	Nike	23.8367	22.3038	23.9483		1	Enko	21.8256	23.0364	22.0124
1	Barefoot	21.4993	20.2734	21.4194		1	Nike	23.7539	22.0406	23.7792		1	Enko	22.4915	26.4497	24.3252
1	Barefoot	19.4684	18.5369	19.8706		1	Nike	23.6667	22.628	23.4922		1	Enko	23.4008	22.2176	23.6302
2	Barefoot	18.3634	17.9514	18.0771		2	Nike	25.164	26.0931	25.2284		2	Enko	23.7267	22.8632	23.8108
2	Barefoot	24.8335	25.0474	26.2338		2	Nike	25.6648	28.5217	24.8554		2	Enko	24.0326	23.0699	23.8299
2	Barefoot	23.3047	25.3056	23.1218		2	Nike	23.8956	25.8024	24.1344		2	Enko	24.3506	23.6986	24.2676
3	Barefoot	24.0501	23.7901	24.1286		3	Nike	25.7667	26.6341	25.7383		3	Enko	24.9872	26.7824	26.4134
3	Barefoot	23.7484	24.4033	23.5552		3	Nike	25.9933	27.4554	27.5461		3	Enko	24.225	25.5085	24.6954
3	Barefoot	24.5823	26.2855	24.876		3	Nike	24.9659	24.8902	25.7982		3	Enko	24.2515	27.7903	24.8968
4	Barefoot	23.8292	26.8127	24.9846		4	Nike	24.5965	27.6242	25.8379		4	Enko	24.0233	23.1318	24.1042
4	Barefoot	22.2521	22.6965	22.2095		4	Nike	23.5572	26.5396	24.0435		4	Enko	23.976	24.1324	24.9315
4	Barefoot	24.5113	26.5721	25.6078		4	Nike	23.6014	23.8564	23.986		4	Enko	24.8265	24.5424	25.5044
5	Barefoot	24.553	25.7571	24.4559		5	Nike	25.9083	28.0206	25.8055		5	Enko	12.5383	12.9883	13.6006
5	Barefoot	25.3365	24.4322	24.8091		5	Nike	25.8033	28.7163	25.8621		5	Enko	11.9981	12.2416	12.8116
5	Barefoot	24.9679	26.8096	24.0503		5	Nike	27.0453	27.4176	27.7202		5	Enko	12.1455	13.7484	12.9793
6	Barefoot	23.1103	21.3183	22.3216		6	Nike	24.9898	25.4991	26.0663		6	Enko	25.9497	24.1235	26.0317
6	Barefoot	23.1103	21.3183	22.3216		6	Nike	25.6473	25.9573	26.6156		6	Enko	24.0118	22.8778	24.1415
6	Barefoot	23.1103	21.3183	22.3216		6	Nike	25.8726	26.5189	26.2053		6	Enko	25.8381	25.232	26.6223
7	Barefoot	27.4709	26.5309	27.6244		7	Nike	27.9709	27.1582	27.4321		7	Enko	27.7177	27.2581	28.6551
7	Barefoot	26.0168	24.2924	25.4486		7	Nike	25.9217	23.9007	25.861		7	Enko	28.2391	26.8571	28.6207
7	Barefoot	26.3931	24.8497	25.9843		7	Nike	27.2359	26.3946	27.6968		7	Enko	25.64	39.9085	31.101
8	Barefoot	26.5652	25.4188	26.3587		8	Nike	27.8862	26.4956	27.6168		8	Enko	28.0618	26.3207	28.3728
8	Barefoot	26.8256	25.0348	26.4171		8	Nike	29.3053	27.9877	28.9241		8	Enko	28.5551	26.9357	28.8129
8	Barefoot	26.6257	25.0738	26.8316		8	Nike	27.5953	27.2293	27.2211		8	Enko	27.4351	26.2533	27.1253
9	Barefoot	24.5012	24.4326	24.6085		9	Nike	26.1496	24.7283	26.041		9	Enko	25.1882	23.316	25.2464
9	Barefoot	24.5153	22.8834	24.301		9	Nike	24.9001	22.814	24.6268		9	Enko	25.0517	23.5588	24.9425
9	Barefoot	23.9585	23.2972	24.0461		9	Nike	24.8275	23.27	25.0066		9	Enko	24.178	22.4465	24.2105
10	Barefoot	28.0791	27.9471	30.4503		10	Nike	26.0285	25.544	26.2764		10	Enko	30.6954	29.9519	31.169
10	Barefoot	26.6423	26.8545	28.6534		10	Nike	27.9276	27.3048	27.8018		10	Enko	29.156	27.2937	29.1257
10	Barefoot	34.5281	31.0946	33.7016		10	Nike	30.309	29.4825	30.7241		10	Enko	29.4432	28.9917	31.1127
11	Barefoot	25.1585		37.2739		11	Nike	25.1214		24.9816		11	Enko	26.7561		45.0333
11	Barefoot	25.7831				11	Nike	28.4073				11	Enko	26.5175
11	Barefoot	24.7826		42.1391		11	Nike	25.317		25.9618		11	Enko	26.1246		35.9226
12	Barefoot	21.2506	20.2226	21.1416		12	Nike	22.3564	20.8608	22.1577		12	Enko	17.7659	17.6455	18.6434
12	Barefoot	20.8048	20.3972	20.8378		12	Nike	22.2098	20.6723	21.8053		12	Enko	22.6469	21.7437	22.5546
12	Barefoot	18.3858	17.8637	18.6023		12	Nike	23.2035	22.3185	23.477		12	Enko	22.2784	21.0026	22.0822
13	Barefoot	21.6106	21.3487	21.6847		13	Nike	23.8937	22.5287	24.2436		13	Enko	23.0282	21.7979	23.5177
13	Barefoot	22.3103	22.5045	22.8374		13	Nike	24.2104	22.889	24.0067		13	Enko	21.0044	20.2801	20.74
13	Barefoot	21.804	20.7434	22.2403		13	Nike	23.3129	22.6061	23.8934		13	Enko	23.3554	22.1679	23.8708
14	Barefoot	24.6629	25.1475	25.1514		14	Nike	23.5736	22.8215	24.0174		14	Enko	24.88	23.4084	24.8678
14	Barefoot	24.7088	24.7711	24.6109		14	Nike	24.2455	23.0517	24.5155		14	Enko	25.3639	24.4491	25.5517
14	Barefoot	23.7464	22.9264	23.2875		14	Nike	25.2205	24.4451	25.4403		14	Enko	24.4478	23.2292	24.5191
15	Barefoot	21.6675	20.8984	21.7296		15	Nike	23.5374	21.8742	23.9017		15	Enko	22.9308	21.0577	23.3516
15	Barefoot	21.6082	20.4371	21.4562		15	Nike	22.429	21.0897	22.7771		15	Enko	23.9372	21.4088	24.1284
15	Barefoot	22.8169	22.1276	23.0719		15	Nike	22.3522	21.0905	22.3799		15	Enko	23.7206	21.241	24.1012
16	Barefoot	23.2532	21.868	22.6131		16	Nike	25.2277	25.1898	25.4458		16	Enko	24.9911	25.3043	25.575
16	Barefoot	24.2076	22.9041	23.6712		16	Nike	25.7574	25.7899	25.8143		16	Enko	24.6701	25.1686	25.7976
16	Barefoot	22.4868	23.733	22.4162		16	Nike	26.1027	26.1833	26.3386		16	Enko	25.0679	25.0606	25.7802
17	Barefoot	28.5129	26.8736	27.714		17	Nike	30.5369	29.6366	30.7871		17	Enko	30.1502	27.7507	30.2923
17	Barefoot	21.0527	20.6326	20.7419		17	Nike	26.6885	24.755	26.1081		17	Enko	29.8005	28.5276	30.505
17	Barefoot	26.5653	25.6705	25.8129		17	Nike	29.6393	28.6102	29.9531		17	Enko	29.7565	29.0606	30.7699
18	Barefoot	24.9655	23.2607	23.9174		18	Nike	26.508	24.6915	26.0569		18	Enko	24.7363	23.6068	25.2732
18	Barefoot	26.4313	27.2307	26.5418		18	Nike	26.3234	24.0017	25.4821		18	Enko	24.5701	23.1834	24.9134
18	Barefoot	24.8466	22.3777	23.6858		18	Nike	26.3359	24.5479	25.9506		18	Enko	21.2685	20.3186	21.4015
19	Barefoot	26.0964	27.9509	26.017		19	Nike	25.7844	26.8446	26.7875		19	Enko	26.1454	25.0473	26.0665
19	Barefoot	26.4623	26.1242	25.9734		19	Nike	24.6746	24.9524	24.8834		19	Enko	24.5847	25.2409	25.3122
19	Barefoot	25.8901	25.5848	25.6317		19	Nike	24.1891	25.0475	24.5474		19	Enko	25.1373	24.3059	24.4488
20	Barefoot	24.2174	23.2299	23.3029		20	Nike	25.011	23.239	24.5836		20	Enko	27.4239	25.0233	27.345
20	Barefoot	24.2769	22.769	23.5819		20	Nike	26.8964	24.5807	26.4716		20	Enko	28.6761	25.7339	28.3739
20	Barefoot	24.7733	24.2272	24.1114		20	Nike	26.0995	24.1176	25.8433		20	Enko	27.061	24.9692	27.1725
21	Barefoot	26.3513	24.6974	26.2107		21	Nike	25.793	24.5909	26.3665		21	Enko	24.8842	23.8407	26.125
21	Barefoot	25.3261	23.7731	25.3385		21	Nike	26.7189	24.4069	26.7096		21	Enko	26.4341	24.188	26.529
21	Barefoot	26.1962	24.3484	26.0277		21	Nike	26.2331	25.1531	26.781		21	Enko	27.8102	25.9727	28.2334
22	Barefoot	25.682	23.7694	24.6451		22	Nike	28.5985	27.828	27.7135		22	Enko	26.412	26.3498	26.9098
22	Barefoot	27.1407	27.3974	26.6969		22	Nike	27.5199	27.2791	27.6605		22	Enko	27.6887	28.4294	29.0676
22	Barefoot	26.6133	25.2061	25.9393		22	Nike	27.5998	28.6229	27.3379		22	Enko	25.2696	25.6396	26.1922
23	Barefoot	26.6646	25.9599	27.5897		23	Nike	26.9552	24.2064	25.8777		23	Enko	26.4728	23.9434	26.3277
23	Barefoot	25.3462	23.5506	24.2535		23	Nike	27.3423	25.1347	26.5459		23	Enko	25.9744	24.4331	26.0129
23	Barefoot	26.4567	26.2705	26.8719		23	Nike	27.2253	23.9894	26.1949		23	Enko	26.0707	23.8108	26.1948
24	Barefoot	20.6654	20.9763	21.0164		24	Nike	20.7419	19.0322	20.5849		24	Enko	20.2069	19.3945	20.9119
24	Barefoot	21.0724	21.1277	20.8676		24	Nike	19.7645	18.5287	19.7875		24	Enko	21.7427	20.6552	21.8448
24	Barefoot	19.2133	19.0607	19.4124		24	Nike	20.7606	19.5197	20.7568		24	Enko	21.7784	20.35	22.0949
25	Barefoot	21.7841	22.4472	22.4159		25	Nike	22.5231	23.2006	21.5214		25	Enko	20.5787	21.3243	19.56
25	Barefoot	21.9362	22.2124	21.5605		25	Nike	22.6229	22.8384	22.0873		25	Enko	22.472	23.0923	21.502
25	Barefoot	21.3704	21.6945	20.2948		25	Nike	23.0661	23.7058	22.1015		25	Enko	21.2186	21.9298	20.1917
26	Barefoot	27.1224	27.8153	28.7086		26	Nike	24.6865	25.3593	24.6886		26	Enko	21.6803	20.4715	21.7416
26	Barefoot	22.4126	22.538			26	Nike	5.98363	5.89551			26	Enko	24.9068	23.1074	24.9956
26	Barefoot	23.2449	22.464	22.5779		26	Nike	25.164	26.0931	25.2284		26	Enko	24.3015	23.3823	24.5552
27	Barefoot	24.1454	24.8582	24.1662		27	Nike	25.3365	29.4035	25.3267		27	Enko	25.485	24.3866	24.9553
27	Barefoot	24.59	26.7979	24.8975		27	Nike	26.2301	29.6158	26.3233		27	Enko	25.7284	24.2936	26.2946
27	Barefoot	24.7811	25.227	24.7557		27	Nike	24.9659	24.8902	25.7982		27	Enko	25.485	24.3866	24.9553
28	Barefoot	24.4791	25.4884	27.0267		28	Nike	25.0319	26.3852	27.5646		28	Enko	24.2981	25.7685	25.0876
28	Barefoot	24.8192	24.5455	27.1663		28	Nike	26.319	27.9718	30.1263		28	Enko	24.0755	25.5679	25.8937
28	Barefoot	23.7412	26.8458	32.7709		28	Nike	24.1728	25.6875	25.5346		28	Enko	23.085	24.5448	24.3916
29	Barefoot	19.254	19.217	19.8717		29	Nike	27.2821	28.2972	27.1064		29	Enko	10.5888	10.2337	10.6675
29	Barefoot	18.1559	18.126	18.7726		29	Nike	25.2874	25.6249	25.514		29	Enko	12.2631	11.9625	12.6135
29	Barefoot	19.5293	19.5369	19.9964		29	Nike	26.0517	25.7841	26.2021		29	Enko	10.7585	10.4876	11.1606
30	Barefoot	23.2956	22.7028	21.5156		30	Nike	26.7298	28.2622	27.4032		30	Enko	23.8128	24.1846	22.1414
30	Barefoot	23.7351	23.5027	22.4151		30	Nike	26.1341	26.9267	27.3604		30	Enko	24.5305	24.8082	23.1273
30	Barefoot	25.0382	25.0141	24.5316		30	Nike	24.6087	26.1389	28.2421		30	Enko	27.0918	27.5097	25.4869
31	Barefoot	22.1309	29.8703	45.4897		31	Nike	26.9638	26.8307	24.4493		31	Enko	25.8933	26.362	26.38
31	Barefoot	25.7932	26.8023	27.8557		31	Nike	26.2364	26.4297	26.1834		31	Enko	26.7912	27.8843	26.535
31	Barefoot	25.8824	26.8135	27.0255		31	Nike	27.0616	26.7214	27.4043		31	Enko	26.1411	27.6363	25.9645
32	Barefoot	27.2912	36.5959	27.3575		32	Nike	26.6637	24.5911	26.6152		32	Enko	27.4202	25.7692	27.712
32	Barefoot	24.8189	24.2488	24.3368		32	Nike	27.589	25.7278	27.5003		32	Enko	27.3288	25.4041	27.6754
32	Barefoot	26.7977	26.1594	26.2899		32	Nike	26.653	24.8776	26.3481		32	Enko	26.2046	24.7395	26.6853
33	Barefoot	23.556	23.8193	23.7934		33	Nike	22.4328	22.5457	21.0542		33	Enko	23.8246	23.986	22.7848
33	Barefoot	24.6019	24.8608	23.9809		33	Nike	23.4955	23.7113	22.3183		33	Enko	24.5039	24.8478	23.5633
33	Barefoot	23.7531	23.5893	21.6292		33	Nike	24.5221	24.9928	23.4165		33	Enko	24.813	24.8883	24.1995
34	Barefoot	26.2911	26.1797	26.493		34	Nike	23.4487	23.7848	24.3722		34	Enko	27.2235	27.5907	25.2461
34	Barefoot	25.3989	25.4221	24.2927		34	Nike	24.2825	26.2907	35.8615		34	Enko	27.4276	26.0741	28.1091
34	Barefoot	23.9331	22.838	22.257		34	Nike	23.9242	34.5669	39.649		34	Enko	26.3139	28.6634	29.6309
35	Barefoot	25.2263	24.095	22.3801		35	Nike	31.5517	24.2895	24.4083		35	Enko	25.5335	29.4317	24.1649
35	Barefoot	21.9675	19.9067	18.9494		35	Nike	27.806	24.5996	24.1703		35	Enko	42.8942	25.5425	24.6271
35	Barefoot	20.2318	18.3632	17.1554		35	Nike	18.7553	15.0426	15.2369		35	Enko	45.4193	32.9885	32.2523
36	Barefoot	21.2267	20.1968	18.8342		36	Nike	20.8755	20.4169	19.9476		36	Enko	21.983	22.6012	20.8126
36	Barefoot	21.3159	21.2512	19.3876		36	Nike	21.3981	21.3669	19.7034		36	Enko	23.0684	23.6255	22.0681
36	Barefoot	11.8518	12.7756	13.0278		36	Nike	20.1624	18.7868	20.0807		36	Enko	22.9041	23.3036	22.1924
37	Barefoot	20.6742	20.434	20.9536		37	Nike	21.915	20.8504	21.937		37	Enko	21.4603	20.7899	22.13
37	Barefoot	21.7358	21.5014	21.9534		37	Nike	21.9985	20.6489	22.1797		37	Enko	21.9266	20.462	22.2692
37	Barefoot	21.7512	21.4713	22.2188		37	Nike	21.646	20.3001	21.9059		37	Enko	21.8357	20.4268	22.1673
38	Barefoot	17.6654	18.4514	17.7685		38	Nike	24.5669	24.2206	24.6038		38	Enko	23.0954	23.13	23.2326
38	Barefoot	16.4998	18.4365	17.5009		38	Nike	24.4194	25.3743	25.1112		38	Enko	23.6388	23.0821	24.1926
38	Barefoot	22.7095	23.1766	22.8671		38	Nike	22.6289	21.8407	23.0369		38	Enko	24.5259	25.4123	25.9206
39	Barefoot	22.2809	21.1439	22.6662		39	Nike	23.935	22.2263	24.0746		39	Enko	23.0516	21.3165	23.7506
39	Barefoot	21.4074	20.5381	21.6994		39	Nike	23.0167	21.5239	23.6793		39	Enko	22.0459	20.0542	22.5038
39	Barefoot	21.349	21.0574	21.8593		39	Nike	24.0582	22.5915	24.641		39	Enko	23.1969	21.3412	23.5874
40	Barefoot	22.138	20.0095	21.4748		40	Nike	25.7207	25.9463	25.8583		40	Enko	22.4865	22.6619	23.3988
40	Barefoot	24.0876	23.7445	23.5272		40	Nike	29.7621	28.8455	29.3408		40	Enko	23.338	23.2592	24.7694
40	Barefoot	23.0079	23.116	22.6801		40	Nike	23.4018	24.0476	24.3482		40	Enko	23.4729	23.8104	25.2208
41	Barefoot	26.8959	26.0121	26.4788		41	Nike	29.5909	28.4178	30.2907		41	Enko	33.2412	32.0934	33.933
41	Barefoot	27.2261	28.003	26.9505		41	Nike	29.8618	30.614	30.7092		41	Enko	32.2196	31.4091	33.9162
41	Barefoot	24.2807	23.3657	24.0329		41	Nike	30.4678	30.4667	31.0956		41	Enko	29.6876	28.2673	29.7668
42	Barefoot	24.4066	26.9623	24.3642		42	Nike	23.5999	25.1089	23.5962		42	Enko	23.814	24.593	24.965
42	Barefoot	25.2107	27.7826	25.1585		42	Nike	23.4491	24.1287	23.8337		42	Enko	23.2247	23.5171	24.4245
42	Barefoot	23.4629	27.1438	23.8387		42	Nike	23.398	23.6699	23.4222		42	Enko	24.1527	24.5089	25.2545
43	Barefoot	24.4112	23.3285	23.6771		43	Nike	24.9286	23.8766	24.9968		43	Enko	24.9303	23.0644	25.2258
43	Barefoot	24.6138	23.5293	24.146		43	Nike	25.1197	23.8873	24.5365		43	Enko	23.4294	22.0205	23.5819
43	Barefoot	25.114	24.8953	25.0652		43	Nike	24.5982	23.8586	24.3119		43	Enko	24.0737	22.5863	24.0848
44	Barefoot	24.0815	22.9283	23.1698		44	Nike	25.8228	23.6628	25.4354		44	Enko	25.666	24.0476	26.0234
44	Barefoot	25.2617	22.7736	24.3785		44	Nike	26.2346	24.3639	25.7563		44	Enko	26.785	23.9594	25.99
44	Barefoot	23.7948	22.9473	23.3806		44	Nike	25.325	24.1381	25.1665		44	Enko	26.1488	25.1701	26.6554
45	Barefoot	23.9114	22.6662	24.1879		45	Nike	25.9381	25.7097	26.9209		45	Enko	25.9185	24.4131	26.6199
45	Barefoot	25.2196	23.9845	25.3782		45	Nike	25.485	24.1408	26.2335		45	Enko	26.2076	24.7722	26.9676
45	Barefoot	24.8315	24.0129	25.0415		45	Nike	22.7346	21.6706	24.6821		45	Enko	23.5193	22.5803	24.4621
46	Barefoot	23.6865	24.7637	23.6578		46	Nike	26.0023	25.7495	26.2687		46	Enko	26.4016	27.2541	27.4417
46	Barefoot	12.5367	17.1521	13.8105		46	Nike	27.3854	28.2659	27.908		46	Enko	26.5087	26.0134	27.4616
46	Barefoot	14.7027	18.609	16.0195		46	Nike	23.2231	26.5544	24.3295		46	Enko	26.4459	27.1337	27.3637
47	Barefoot	26.5993	27.409	26.7592		47	Nike	24.9127	24.6801	24.5702		47	Enko	26.1709	24.3742	26.3333
47	Barefoot	27.2934	29.228	27.2617		47	Nike	26.2044	23.9923	25.3148		47	Enko	25.7766	24.035	25.6315
47	Barefoot	26.7769	24.5455	25.7977		47	Nike	26.4578	23.9712	26.1371		47	Enko	26.2576	25.2865	26.0537
48	Barefoot	21.4204	19.8911	21.366		48	Nike	20.8387	19.1543	20.5832		48	Enko	18.419	16.7876	19.0091
48	Barefoot	20.2043	19.989	20.229		48	Nike	16.049	15.4422	17.4689		48	Enko	16.7202	16.1772	17.5374
48	Barefoot	19.6441	18.018	19.4912		48	Nike	18.6471	17.659	19.0794		48	Enko	18.8891	17.2371	19.3655
